# Supplementary material
Source: PubMed Central journal article supplement (PMC6647793)
Supplement: ao8b03391_si_001.pdf [file ao8b03391_si_001.pdf]

## Supporting Information

### The role of linker length and antigen density in nanoparticle peptide vaccine

Chintan H. Kapadia<sup>†1</sup>, Shaomin Tian<sup>‡</sup>, Jillian L. Perry<sup>§</sup>, J. Christopher Luft<sup>†</sup>, Joseph M. DeSimone<sup>†‡\*#</sup>

<sup>†</sup> Division of Molecular Pharmaceutics, Eshelman School of Pharmacy, University of North Carolina at Chapel Hill, Chapel Hill, NC 27599.

<sup>‡</sup> Department of Microbiology & Immunology, University of North Carolina at Chapel Hill, Chapel Hill, NC 27599

<sup>§</sup> Lineberger Comprehensive Cancer Center, University of North Carolina, Chapel Hill, NC 27599

<sup>\*</sup> Department of Chemistry, University of North Carolina, Chapel Hill, NC 27599

<sup>#</sup> Department of Chemical and Biomolecular Engineering, NC State University, Raleigh, NC 27695, USA

#### Corresponding

Author: Joseph M. DeSimone,  
Department of Chemistry,  
The University of North Carolina at Chapel Hill,  
CB# 3290, 257 Caudill,  
Chapel Hill, NC 27599-3290  
Tel: (919) 962-2166  
Fax: (919) 962-5467  
Email: desimone@unc.edu

**Keywords:** Nanoparticle cancer vaccine, peptide vaccine, antigen proximity, antigen density, immunoengineering

---

<sup>1</sup> Current Affiliation of Chintan H. Kapadia, Department of Biomedical Engineering, University of Delaware, Newark, DE 19716, USA

This supporting information has the following contents:

Table 1. Physical characterization of particles for linker length study

Figure S1. Effect of linker length and peptide antigen density on uptake of NPs by BMDCs.

Table S1: Physical Characterization of Particles for linker length study

| Formulations                                           | Size (nm) | PDI   | ZP (mV) | $\mu\text{g}$ SIINFEKL /mg NP | $\mu\text{g}$ CpG /mg NP | Antigen/ $\text{nm}^2$ |
|--------------------------------------------------------|-----------|-------|---------|-------------------------------|--------------------------|------------------------|
| NP-PEG <sub>5k</sub> -CSIINFEKL <sub>low</sub> -CpG    | 257       | 0.138 | 2       | 109                           | 27.8                     | 1.20                   |
| NP-PEG <sub>5k</sub> -CSIINFEKL <sub>medium</sub> -CpG | 1361      | 0.320 | 1       | 171                           | 27.5                     | 1.89                   |
| NP-PEG <sub>5k</sub> -CSIINFEKL <sub>high</sub> -CpG   | 2183      | 0.393 | -2      | 386                           | 32.7                     | 3.76                   |

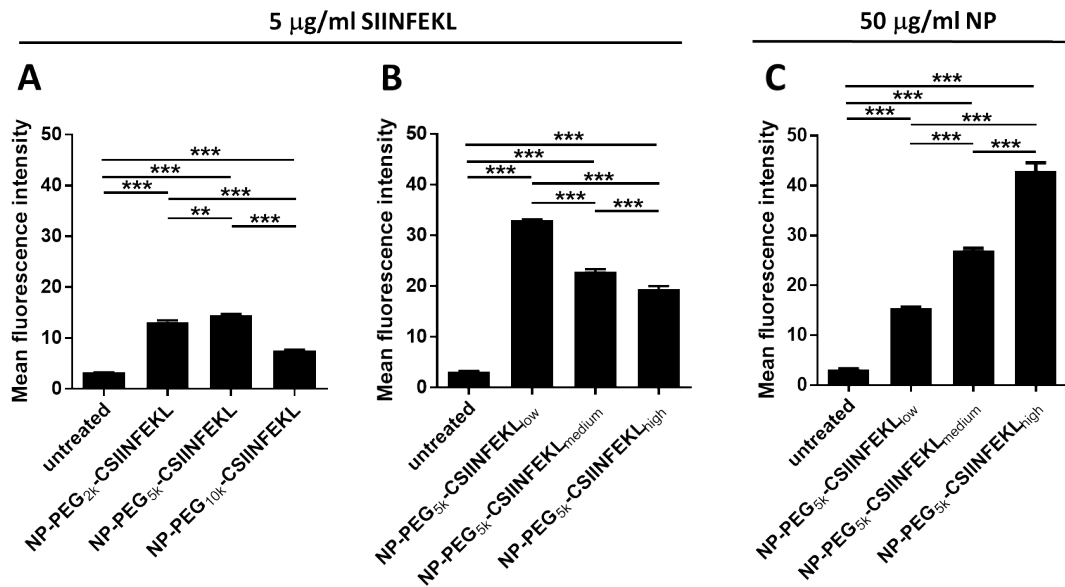

Figure S1: Effect of linker length and peptide antigen density on uptake of NPs by BMDCs. BMDC on day 6 were treated with NPs labeled with FITC for 4 hours, washed and further incubated at 37 °C for 20 hours. Cells with NP fluorescence was analyzed by flow cytometry. A) Linker length comparison at 5 µg/mL SIINFEKL dose; B) antigen density comparison at 5 µg/mL SIINFEKL dose; C) antigen density comparison at 50 µg/mL NP dose. Results are shown as mean  $\pm$  SEM, n=3.
